# Supplementary material for: BAD regulates mammary gland morphogenesis by 4E-BP1-mediated control of localized translation in mouse and human models
Source: PubMed Central journal article supplement (PMC8134504; doi:10.1038/s41467-021-23269-8), 2021-05-19
Supplement: 41467_2021_23269_MOESM11_ESM.pdf [file 41467_2021_23269_MOESM11_ESM.pdf]

## Reporting Summary

Nature Research wishes to improve the reproducibility of the work that we publish. This form provides structure for consistency and transparency in reporting. For further information on Nature Research policies, see our [Editorial Policies](#) and the [Editorial Policy Checklist](#).

### Statistics

For all statistical analyses, confirm that the following items are present in the figure legend, table legend, main text, or Methods section.

- |                                     |                                                                                                                                                                                                                                                                                                |
|-------------------------------------|------------------------------------------------------------------------------------------------------------------------------------------------------------------------------------------------------------------------------------------------------------------------------------------------|
| n/a                                 | Confirmed                                                                                                                                                                                                                                                                                      |
| <input type="checkbox"/>            | <input checked="" type="checkbox"/> The exact sample size ( $n$ ) for each experimental group/condition, given as a discrete number and unit of measurement                                                                                                                                    |
| <input type="checkbox"/>            | <input checked="" type="checkbox"/> A statement on whether measurements were taken from distinct samples or whether the same sample was measured repeatedly                                                                                                                                    |
| <input type="checkbox"/>            | <input checked="" type="checkbox"/> The statistical test(s) used AND whether they are one- or two-sided<br><i>Only common tests should be described solely by name; describe more complex techniques in the Methods section.</i>                                                               |
| <input checked="" type="checkbox"/> | <input type="checkbox"/> A description of all covariates tested                                                                                                                                                                                                                                |
| <input type="checkbox"/>            | <input checked="" type="checkbox"/> A description of any assumptions or corrections, such as tests of normality and adjustment for multiple comparisons                                                                                                                                        |
| <input type="checkbox"/>            | <input checked="" type="checkbox"/> A full description of the statistical parameters including central tendency (e.g. means) or other basic estimates (e.g. regression coefficient) AND variation (e.g. standard deviation) or associated estimates of uncertainty (e.g. confidence intervals) |
| <input type="checkbox"/>            | <input checked="" type="checkbox"/> For null hypothesis testing, the test statistic (e.g. $F$ , $t$ , $r$ ) with confidence intervals, effect sizes, degrees of freedom and $P$ value noted<br><i>Give <math>P</math> values as exact values whenever suitable.</i>                            |
| <input checked="" type="checkbox"/> | <input type="checkbox"/> For Bayesian analysis, information on the choice of priors and Markov chain Monte Carlo settings                                                                                                                                                                      |
| <input checked="" type="checkbox"/> | <input type="checkbox"/> For hierarchical and complex designs, identification of the appropriate level for tests and full reporting of outcomes                                                                                                                                                |
| <input checked="" type="checkbox"/> | <input type="checkbox"/> Estimates of effect sizes (e.g. Cohen's $d$ , Pearson's $r$ ), indicating how they were calculated                                                                                                                                                                    |

*Our web collection on [statistics for biologists](#) contains articles on many of the points above.*

### Software and code

Policy information about [availability of computer code](#)

Data collection

Proteome Discoverer™ 1.4.1.14  
Epson Perfection scanner v1650 GUI  
BD Accuri™ C6  
Microsoft Office16 Word  
Microsoft Office16 Excel  
GraphPad Prism version 9.0.0 (86)  
Image Studio™ version 5.2

Data analysis

MATLAB R2018a  
GraphPad Prism version 9.0.0 (86)  
Proteome Discoverer™ 1.4.1.14's SEQUEST search engine  
Enrichr web application  
FlowJo (v10)

For manuscripts utilizing custom algorithms or software that are central to the research but not yet described in published literature, software must be made available to editors and reviewers. We strongly encourage code deposition in a community repository (e.g. GitHub). See the Nature Research [guidelines for submitting code & software](#) for further information.

## Data

Policy information about [availability of data](#)

All manuscripts must include a [data availability statement](#). This statement should provide the following information, where applicable:

- Accession codes, unique identifiers, or web links for publicly available datasets
- A list of figures that have associated raw data
- A description of any restrictions on data availability

The mass spectrometry proteomics data have been deposited to the ProteomeXchange Consortium via the PRIDE (PubMed ID: 30395289) partner repository with the dataset identifier PXD014347 ( <https://www.ebi.ac.uk/pride/archive/projects/PXD014347>). The comparative proteomic data analysis has been included in Sup. Data 1. (Mus musculus proteome retrieved from UniprotKB 'release-2015\_10' version on October 16, 2015).

## Field-specific reporting

Please select the one below that is the best fit for your research. If you are not sure, read the appropriate sections before making your selection.

- Life sciences     Behavioural & social sciences     Ecological, evolutionary & environmental sciences

For a reference copy of the document with all sections, see [nature.com/documents/nr-reporting-summary-flat.pdf](https://www.nature.com/documents/nr-reporting-summary-flat.pdf)

## Life sciences study design

All studies must disclose on these points even when the disclosure is negative.

|                 |                                                                                                                                                                                                                                                                                                                                                                                                                                                                                                                             |
|-----------------|-----------------------------------------------------------------------------------------------------------------------------------------------------------------------------------------------------------------------------------------------------------------------------------------------------------------------------------------------------------------------------------------------------------------------------------------------------------------------------------------------------------------------------|
| Sample size     | No formal sample size calculation was performed. In experiments involving cell imaging analyses where biological material was not limiting, sample size was $n > 10$ . With significance set at $\alpha = 0.05$ and power of 0.8, this would identify a difference of 50% between groups, which is an acceptable range of scientific interest. In analyses using animals, reduction of numbers was a priority such that $n > 5$ independent animals was chosen. We accepted a larger effect difference would be identified. |
| Data exclusions | No data was excluded from the analyses.                                                                                                                                                                                                                                                                                                                                                                                                                                                                                     |
| Replication     | All reasonable measures were taken to verify reproducibility of experimental findings. Such measures included use of tissues or cells that were independently harvested for biological replicates. All attempts at replication were successful. A minimum of 3 independent experiments were performed and included in all the figures.                                                                                                                                                                                      |
| Randomization   | Randomization is not relevant. Samples were allocated into experimental groups based on genotype.                                                                                                                                                                                                                                                                                                                                                                                                                           |
| Blinding        | Since data collection and analyses are quantitative and not qualitative, blinding is not relevant to this study.                                                                                                                                                                                                                                                                                                                                                                                                            |

## Reporting for specific materials, systems and methods

We require information from authors about some types of materials, experimental systems and methods used in many studies. Here, indicate whether each material, system or method listed is relevant to your study. If you are not sure if a list item applies to your research, read the appropriate section before selecting a response.

### Materials & experimental systems

| n/a                                 | Involved in the study                                           |
|-------------------------------------|-----------------------------------------------------------------|
| <input type="checkbox"/>            | <input checked="" type="checkbox"/> Antibodies                  |
| <input type="checkbox"/>            | <input checked="" type="checkbox"/> Eukaryotic cell lines       |
| <input checked="" type="checkbox"/> | <input type="checkbox"/> Palaeontology and archaeology          |
| <input type="checkbox"/>            | <input checked="" type="checkbox"/> Animals and other organisms |
| <input checked="" type="checkbox"/> | <input type="checkbox"/> Human research participants            |
| <input checked="" type="checkbox"/> | <input type="checkbox"/> Clinical data                          |
| <input checked="" type="checkbox"/> | <input type="checkbox"/> Dual use research of concern           |

### Methods

| n/a                                 | Involved in the study                              |
|-------------------------------------|----------------------------------------------------|
| <input checked="" type="checkbox"/> | <input type="checkbox"/> ChIP-seq                  |
| <input type="checkbox"/>            | <input checked="" type="checkbox"/> Flow cytometry |
| <input checked="" type="checkbox"/> | <input type="checkbox"/> MRI-based neuroimaging    |

## Antibodies

Antibodies used

All antibodies (primary and secondary) and fluorescent markers are listed below. Supplementary Data 4 contains this information together with their source, validation, dilution as well as hyperlink to their supplier web page. For the 246 antibodies probed by MD Anderson RPPA services, refer to Supplementary Data 2 and Supplementary Data 4.

Primary antibodies  
Mouse-anti-CK14 ; abcam --Cat# ab7800

Mouse-anti-Paxillin ; BD biosciences --Cat# 610051  
 Mouse-anti-pS112-BAD ; CST --Cat# 9296  
 Mouse-anti-Puromycin ; Sigma --Cat# MABE343  
 Mouse-anti-Tubulin ; Sigma --Cat# T5168  
 Rabbit-anti-4E-BP1 ; CST --Cat# 9644  
 Rabbit-anti-Akt ; CST --Cat# 9272  
 Rabbit-anti-BAD ; Sigma --Cat# B0684  
 Rabbit-anti-BclXL ; CST --Cat# 2762  
 Rabbit-anti-Calnexin ; Enzo --Cat# ADI-SPA-860  
 Rabbit-anti-Caspase 3 ; Enzo --Cat# ADI-AAP-113  
 Rabbit-anti-CD24-PE ; StemCell Technologies --Cat# 60099PE, 60099PE.1  
 Rabbit-anti-CD49f-FITC ; StemCell Technologies --Cat# 60037FI, 60037FI.1  
 Rabbit-anti-CK18 ; Thermo Fisher Scientific --Cat# MA5-15458  
 Rabbit-anti-cleaved Caspase 3 ; CST --Cat# 9664  
 Rabbit-anti-eIF4E ; CST --Cat# 9742  
 Rabbit-anti-eIF4G ; CST --Cat# 2498  
 Rabbit-anti-mouse CD326 (Ep-CAM) -647 ; BioLegend --Cat# 118212  
 Rabbit-anti-ERK1/2 ; Santa Cruz --Cat# sc-93  
 Rabbit-anti-mTOR ; CST --Cat# 2983  
 Rabbit-anti-p70S6K ; CST --Cat# 2708  
 Rabbit-anti-pS112-BAD ; CST --Cat# 9291  
 Rabbit-anti-pS136-BAD ; abcam --Cat# ab28824  
 Rabbit-anti-pS136-BAD ; CST --Cat# 5286  
 Rabbit-anti-pS2448-mTOR ; CST --Cat# 2971  
 Rabbit-anti-pS473-Akt ; CST --Cat# 4058  
 Rabbit-anti-pS65-4E-BP1 ; CST --Cat# 9456  
 Rabbit-anti-pT389-p70S6K ; CST --Cat# 9205  
 Rabbit-anti-T202/Y204-ERK1/2 ; CST --Cat# 9101  
 Rabbit-anti-T37/46-4E-BP1 ; CST --Cat# 2855  
 Rabbit-anti-Tom20 ; Santa Cruz --Cat# sc-11415

#### Secondary antibodies

Donkey-anti-mouse Alexa Fluor® 488 ; Thermo Fisher Scientific --Cat# A21202  
 Donkey-anti-mouse Alexa Fluor® 555 ; Thermo Fisher Scientific --Cat# A31570  
 Donkey-anti-mouse Alexa Fluor® 647 ; Thermo Fisher Scientific --Cat# A31571  
 Donkey-anti-rabbit Alexa Fluor® 647 ; Thermo Fisher Scientific --Cat# A31573  
 Goat-anti-mouse Alexa Fluor® 680 ; Thermo Fisher Scientific --Cat# A21057  
 Goat-anti-rabbit Alexa Fluor® 488 ; Thermo Fisher Scientific --Cat# A11008  
 Goat-anti-rabbit Cy3 ; abcam --Cat# ab97075

#### Fluorescent markers

DAPI (4',6-Diamidino-2-Phenylindole, Dihydrochloride, Nucleus marker) ; Thermo Fisher Scientific --Cat# D1306  
 Phalloidin-Alexa Fluor® 647 (F-actin marker) ; Thermo Fisher Scientific --Cat# A22287

Validation

Validation details are updated in supplementary Data 2 and Supplementary Data 4

## Eukaryotic cell lines

Policy information about [cell lines](#)

|                                                                      |                                                                                                                                                                                                                                         |
|----------------------------------------------------------------------|-----------------------------------------------------------------------------------------------------------------------------------------------------------------------------------------------------------------------------------------|
| Cell line source(s)                                                  | MCF10A parental cell line was purchased from ATCC (invoice provided during review process)                                                                                                                                              |
| Authentication                                                       | As per ATCC standard practice, our purchased MCF10A cell line was authenticated using Short Tandem Repeat (STR) Profiling, Cellular Morphology, Karyotyping and Cytochrome C Oxidase I (COI) Assay Testing.                             |
| Mycoplasma contamination                                             | We routinely test with a mycoplasma-specific PCR test (Eldering et al. 2004, <i>Biologicals: Journal of the International Association of Biological Standardization</i> 32: 183) and demonstrate that the cells are free of mycoplasma. |
| Commonly misidentified lines<br>(See <a href="#">ICLAC</a> register) | None                                                                                                                                                                                                                                    |

## Animals and other organisms

Policy information about [studies involving animals](#); [ARRIVE guidelines](#) recommended for reporting animal research

|                    |                                                                                                                                                                                                                                                                                                                                                 |
|--------------------|-------------------------------------------------------------------------------------------------------------------------------------------------------------------------------------------------------------------------------------------------------------------------------------------------------------------------------------------------|
| Laboratory animals | <p>All mouse strains were in the C57BL/6J background. Only female mice were used, their age is listed below:<br/>           Fig 1a-b, Puberty 5wk; Adult 12wk; Pregnant and Involution 8-12wk.<br/>           Fig 2a-c, Pubertal onset 4wk; Puberty 5wk; End of puberty 8wk; Old virgin 40-43wk. Fig 2e, Pre-puberty 3wk; Donor tissue 8wk.</p> |
|--------------------|-------------------------------------------------------------------------------------------------------------------------------------------------------------------------------------------------------------------------------------------------------------------------------------------------------------------------------------------------|

Fig 3b-d, Primary Organoids source, pubertal 5wk mice.  
 Fig 5a-d, Pubertal onset 4wk; Puberty 5wk. Fig 5e, Primary Organoids source, pubertal 5wk mice.  
 Sup Fig 1a-f, Pubertal onset 4wk; Puberty 5wk; End of puberty 8wk.  
 Sup Fig 2a-f, Pre-puberty 3wk; Puberty 5wk; End of puberty 8wk; Old virgin 40-43wk; Pregnant and Involution 8-12wk.  
 Sup Fig 3a-c, Primary Organoids source, pubertal 5wk mice.  
 Sup Fig 4a, Pubertal onset 4wk; Puberty 5wk.  
 Sup Fig 5a, Puberty 5wk.  
 Sup Fig 6a-c, Primary epithelial cells source for flow cytometry, 8wk mice.  
 Sup Fig 7a-f, Pubertal onset 4wk; Puberty 5wk; Primary Organoids source, pubertal 5wk mice.  
 Sup Fig 8c-d, Primary Organoids source, pubertal 5wk mice.  
 Sup Fig 9b, Primary Organoids source, pubertal 5wk mice.

|                         |                                                                                                                                                                                                                                                                                                                                                                           |
|-------------------------|---------------------------------------------------------------------------------------------------------------------------------------------------------------------------------------------------------------------------------------------------------------------------------------------------------------------------------------------------------------------------|
| Wild animals            | The study did not involve wild animals                                                                                                                                                                                                                                                                                                                                    |
| Field-collected samples | The study did not involve samples collected from the field                                                                                                                                                                                                                                                                                                                |
| Ethics oversight        | Animal procedures were performed in accordance with the guidelines and regulations set forth by the Canadian Council on Animal Care and approved by the University of Alberta Health Sciences 2 Animal Care and Use Committee (Protocol# AUP00000386). Mice were kept in a temperature (22C) and humidity (40-60%) controlled room on a 14-hour light/10-hour dark cycle. |

Note that full information on the approval of the study protocol must also be provided in the manuscript.

## Flow Cytometry

### Plots

Confirm that:

- The axis labels state the marker and fluorochrome used (e.g. CD4-FITC).
- The axis scales are clearly visible. Include numbers along axes only for bottom left plot of group (a 'group' is an analysis of identical markers).
- All plots are contour plots with outliers or pseudocolor plots.
- A numerical value for number of cells or percentage (with statistics) is provided.

### Methodology

|                           |                                                                                                                                                                                                                                                                                                                                                                                                                                                                                                                                                                                                                                                                                                                                                                                                                   |
|---------------------------|-------------------------------------------------------------------------------------------------------------------------------------------------------------------------------------------------------------------------------------------------------------------------------------------------------------------------------------------------------------------------------------------------------------------------------------------------------------------------------------------------------------------------------------------------------------------------------------------------------------------------------------------------------------------------------------------------------------------------------------------------------------------------------------------------------------------|
| Sample preparation        | 8-wk mouse mammary glands were minced using a sterile blade and subsequently digested in dissociation medium (20mg Collagenase A and 10mg Dispase II in 10ml DMEM/F12) for 3 hours at 37°C with 120 rpm shaking. The dissociated tissue was spun down at 450g for 10 minutes and then supernatant was discarded. Preparation of a single cell suspension was done as detailed (Prater, M., Shehata, M., Watson, C. J. & Stingl, J. Enzymatic dissociation, flow cytometric analysis, and culture of normal mouse mammary tissue. <i>Methods Mol. Biol.</i> 946, 395-409 (2013)).                                                                                                                                                                                                                                  |
| Instrument                | BD Accuri™ C6 flow cytometer                                                                                                                                                                                                                                                                                                                                                                                                                                                                                                                                                                                                                                                                                                                                                                                      |
| Software                  | BD Accuri™ C6 flow cytometer software was used to collect data, FlowJo (v10) was used to analyze the data                                                                                                                                                                                                                                                                                                                                                                                                                                                                                                                                                                                                                                                                                                         |
| Cell population abundance | EasySep™ Mouse Epithelial Cell Enrichment Kit II (Stem Cell Technologies) was used to exclude non-epithelial (lineage negative) cells following the manufacturer's instructions. This kit specifically uses immunomagnetic negative selection. The EasySep™ procedure involves labeling unwanted non-epithelial cells with biotinylated antibodies and magnetic particles. The magnetically labeled cells are separated from untouched desired cells by using an EasySep™ magnet and simply pouring the desired cells into a new tube.                                                                                                                                                                                                                                                                            |
| Gating strategy           | FSC-A/SSC-A gate (see Supp. Fig 6a) was used to gate for cells. FSC-A/FSC-H gate (see Supp. Fig 6a) was used to gate for single cells. Luminal cell populations were gated with EpCAM <sup>high</sup> CD49 <sup>med</sup> or CD24 <sup>high</sup> CD49 <sup>med</sup> while basal cell populations were gated with EpCAM <sup>med</sup> CD49 <sup>high</sup> or CD24 <sup>med</sup> CD49 <sup>high</sup> (see Supp. Fig 6b-c). These markers were used because they had been shown to have the least tendency of contaminating gated basal cells with non-epithelial cells, especially in the C57BL/6J background, which is the strain of mice used in our study (Gao, H. et al. Murine mammary stem/progenitor cell isolation: Different method matters? <i>Springerplus</i> 5, 140-3. eCollection 2016 (2016)). |

- Tick this box to confirm that a figure exemplifying the gating strategy is provided in the Supplementary Information.
